# Supplementary material for: Interplay between pre-mRNA splicing and microRNA biogenesis within the supraspliceosome
Source: PubMed Central journal article supplement — Nucleic Acids Res. 2014 Jan 23;42(7):4640–51. doi: 10.1093/nar/gkt1413 (PMC3985634; doi:10.1093/nar/gkt1413), 2014-01-23
Supplement: supp_gkt1413_nar-02556-a-2013-File009.pdf [file supp_gkt1413_nar-02556-a-2013-File009.pdf]

## Interplay Between pre-mRNA Splicing and microRNA Biogenesis

### within the Supraspliceosome

Lily Agranat-Tamir<sup>1</sup>, Noam Shomron<sup>2</sup>, Joseph Sperling<sup>3</sup> and Ruth Sperling<sup>1</sup>

### Supplementary Data

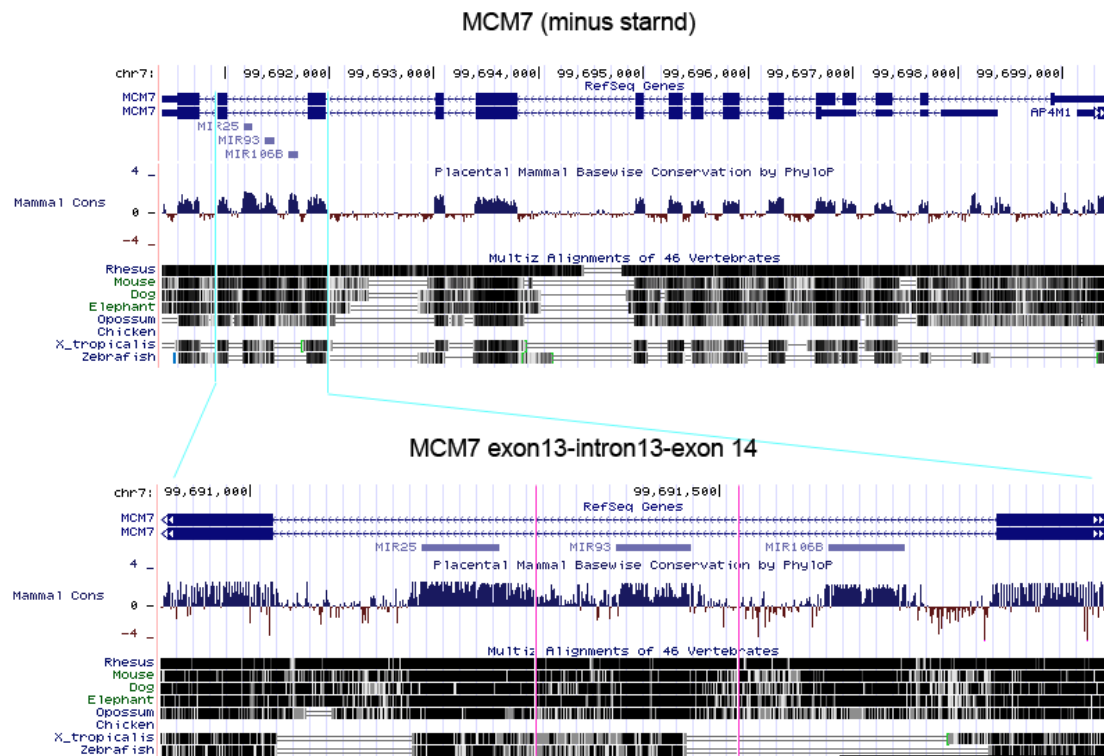

**Figure S1. Conservation of the Sequences of the miR-106b-25 cluster** (sequences taken from the UCSC genome browser).

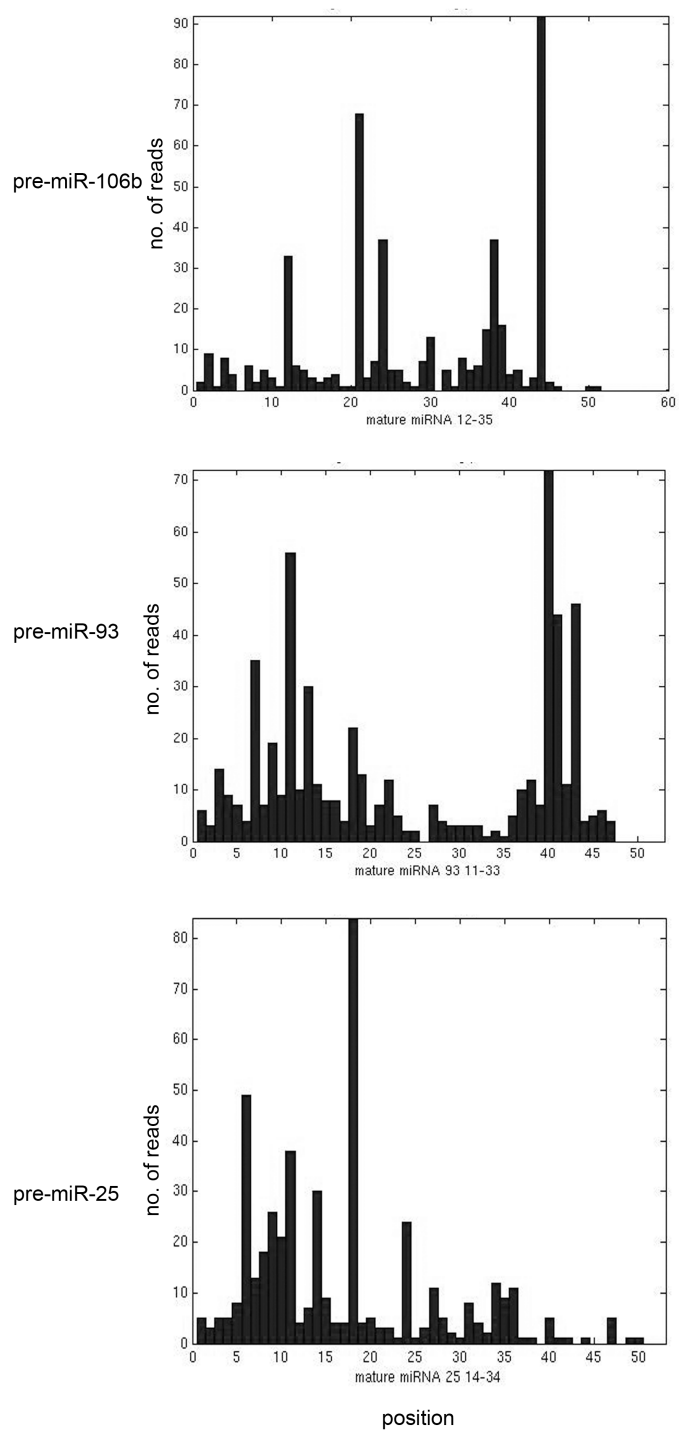

**Figure S2. Read starts of pre-miRs 106b, 93 and 25.** Results of deep sequencing of small RNA from supraspliceosome fractions.

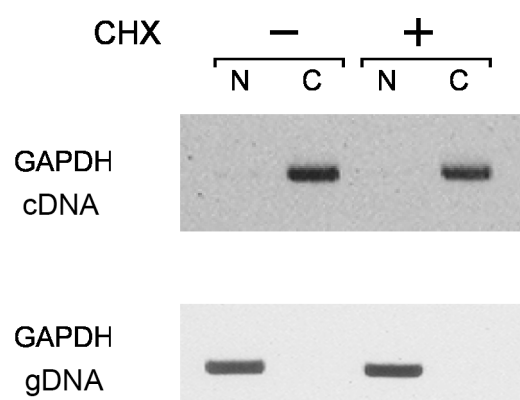

**Figure S3. Fractionation into Nuclear and cytoplasmic fractions.** Negative and positive controls for the fractionation depicted in Figure 4. GAPDH mRNA is found in the cytoplasmic fractions, while GAPDH DNA is found in the nuclear fractions. HeLa cells, either treated (+) or untreated (-) with 50  $\mu$ g/ml cycloheximide (CHX) for 2 hours, were fractionated into nuclear and cytoplasmic fractions. RT-PCR analysis of GAPDH mRNA (upper panel); and PCR of GAPDH gDNA (lower panel).
